# Supplementary material for: An Evaluation of ¡Haz Espacio Para Papi!, a Culturally Tailored Nutrition and Physical Activity Pilot Program for Mexican-Heritage Fathers
Source: MDPI journal article supplement (doi:10.3390/nu16081153), 2024-04-13
Supplement: s1 [file s1]

**Table S3.** Mixed analysis of variance summary table to evaluate differences in fathers' weekly average Veggie Meter® scores, total fruits and vegetables, and healthy dietary behavior scores between pre-test and post-test and between treatment (n = 35) and wait-listed control comparison (n = 46) groups.

| Source of variation         | <i>df</i> | <i>F</i> -value | <i>P</i>     | $\eta^{2b}$ |
|-----------------------------|-----------|-----------------|--------------|-------------|
| <b>Veggie Meter® scores</b> |           |                 |              |             |
| Group                       | 1         | 1.59            | 0.21         | 0.02        |
| Time                        | 1         | 0.45            | 0.51         | <0.01       |
| Group*Time                  | 1         | 0.00            | 1.0          | <0.01       |
| Total                       | 161       |                 |              |             |
| <b>Total FV<sup>a</sup></b> |           |                 |              |             |
| Group                       | 1         | 0.38            | 0.54         | <0.01       |
| Time                        | 1         | 3.03            | 0.09         | <0.01       |
| Group*Time                  | 1         | 0.33            | 0.33         | <0.01       |
| Total                       | 160       |                 |              |             |
| <b>HDBS</b>                 |           |                 |              |             |
| Group                       | 1         | 0.67            | 0.42         | <0.01       |
| Time                        | 1         | 6.36            | <b>0.01*</b> | 0.02        |
| Group*Time                  | 1         | 1.03            | 0.31         | <0.01       |
| Total                       | 161       |                 |              |             |

Abbreviations:  $\eta^2$ , eta squared; *df*, degrees of freedom; FV, fruits and vegetables; HDBS, healthy dietary behavior score. <sup>a</sup>One total FV outlier was removed from data analysis. <sup>b</sup>Group differences accounted for very little in each of the outcomes.
