# Supplementary material for: An Evaluation of ¡Haz Espacio Para Papi!, a Culturally Tailored Nutrition and Physical Activity Pilot Program for Mexican-Heritage Fathers
Source: MDPI journal article supplement (doi:10.3390/nu16081153), 2024-04-13
Supplement: s1 [file s1]

**Table S1.** Pre-test sociodemographic characteristics of 35 Mexican-heritage treatment participants and 46 wait-listed control comparisons participating in a six-week father-focused family-centered nutrition program.

| Sociodemographic characteristic              | Treatment (n = 35)               | Control comparison (n = 46) |
|----------------------------------------------|----------------------------------|-----------------------------|
|                                              | Mean $\pm$ s.d. (range) or n (%) |                             |
| Age                                          | 38.9 $\pm$ 7.1 (28–59)           | 38.7 $\pm$ 8.9 (26–58)      |
| Body mass index <sup>a</sup>                 | 30.1 $\pm$ 5.4 (22.1–46.1)       | 31.3 $\pm$ 5.5 (22.1–49.7)  |
| Marital status                               |                                  |                             |
| Married                                      | 23 (65.7)                        | 25 (54.4)                   |
| Living with spouse – not married             | 12 (34.3)                        | 21 (45.7)                   |
| Education attainment                         |                                  |                             |
| Didn't go to school                          | 1 (2.9)                          | 1 (2.3)                     |
| Some school                                  | 24 (68.6)                        | 34 (73.9)                   |
| GED or HS diploma                            | 8 (22.8)                         | 9 (19.6)                    |
| Some college                                 | 2 (5.7)                          | 1 (2.2)                     |
| College degree                               | 0 (0.0)                          | 1 (2.2)                     |
| Total residents in household                 | 7.1 $\pm$ 2.1 (4–13)             | 7.1 $\pm$ 2.0 (4–13)        |
| Number of adults <sup>b</sup>                | 2.6 $\pm$ 1.0 (2–5)              | 2.7 $\pm$ 1.0 (2–6)         |
| Number of children <sup>c</sup>              | 4.5 $\pm$ 1.9 (2–8)              | 4.4 $\pm$ 1.9 (2–9)         |
| Ages of adults in household (years of age)   | 36.4 $\pm$ 11.4 (18–79)          | 37.3 $\pm$ 12.3 (26–77)     |
| Ages of children in household (years of age) | 9.0 $\pm$ 4.2 (3 mo–17)          | 9.3 $\pm$ 4.2 (3 mo–17)     |

Abbreviations: Abbreviations: GED, general education development; HS, high school. *Promotoras* gathered pre-test (baseline) sociodemographic characteristics from program participants and wait-list control comparisons two weeks prior to participants starting the program. <sup>a</sup>Body mass index was calculated using kg/m<sup>2</sup>. <sup>b</sup>Adults were defined as  $\geq 18$  years of age. <sup>c</sup>Children were defined as  $\leq 17$  years of age.
