# Supplementary material for: An Evaluation of ¡Haz Espacio Para Papi!, a Culturally Tailored Nutrition and Physical Activity Pilot Program for Mexican-Heritage Fathers
Source: MDPI journal article supplement (doi:10.3390/nu16081153), 2024-04-13
Supplement: s1 [file s1]

**Table S2.** Descriptive statistics of within-group mean change at post-test for each program outcome for 35 treatment participants and 46 wait-listed control comparisons.

| Measure                          | Treatment (n = 35)        |                           |             |         | Control comparison (n = 46 <sup>e</sup> ) |                           |             |         |
|----------------------------------|---------------------------|---------------------------|-------------|---------|-------------------------------------------|---------------------------|-------------|---------|
|                                  | Pre-test                  | Post-test                 | Mean change | P value | Pre-test                                  | Post-test                 | Mean change | P value |
| <b>Total fruit<sup>a</sup></b>   | 3.7 ± 2.4 (0–10)          | 4.0 ± 2.4 (1–10)          | 0.23 ± 1.8  | 0.47    | 3.5 ± 3.2 (0–16)                          | 3.7 ± 2.4 (0–10)          | 0.13 ± 3.6  | 0.81    |
| Fresh fruit                      | 2.5 ± 1.6 (0–7)           | 2.8 ± 1.5 (0–8)           | 0.31 ± 1.6  | 0.25    | 2.3 ± 2.6 (0–16)                          | 2.5 ± 1.6 (0–7)           | 0.15 ± 3.0  | 0.73    |
| 100% fruit juice                 | 1.2 ± 1.5 (0–5)           | 1.2 ± 1.4 (0–5)           | -0.09 ± 1.3 | 0.70    | 1.2 ± 1.6 (0–7)                           | 1.2 ± 1.4 (0–5)           | -0.22 ± 1.9 | 0.94    |
| <b>Total veggies<sup>b</sup></b> | 5.2 ± 3.3 (1–17)          | 5.7 ± 2.7 (0–12)          | 0.51 ± 3.7  | 0.42    | 5.3 ± 4.4 (0–24)                          | 5.8 ± 3.3 (1–17)          | 0.54 ± 5.4  | 0.50    |
| White potatoes                   | 1.5 ± 1.0 (0–4)           | 1.8 ± 1.5 (0–6)           | 0.29 ± 1.9  | 0.39    | 1.5 ± 1.4 (0–7)                           | 1.7 ± 1.0 (0–5)           | 0.20 ± 1.6  | 0.40    |
| Lettuce                          | 2.0 ± 1.5 (0–7)           | 1.7 ± 1.1 (0–3)           | -0.29 ± 1.4 | 0.23    | 1.6 ± 1.6 (0–7)                           | 2.2 ± 1.5 (0–7)           | 0.54 ± 2.0  | 0.07    |
| Other veggies                    | 1.7 ± 1.6 (0–7)           | 2.2 ± 1.7 (0–7)           | 0.51 ± 2.1  | 0.15    | 2.1 ± 3.2 (0–21)                          | 2.0 ± 1.5 (0–7)           | -0.20 ± 3.7 | 0.72    |
| <b>Total FV</b>                  | 9.0 ± 5.0 (2–27)          | 9.7 ± 4.2 (3–20)          | 0.74 ± 4.7  | 0.35    | 8.1 ± 5.4 (1–28)                          | 9.5 ± 4.6 (2–27)          | 1.50 ± 6.3  | 0.12    |
| <b>VM score<sup>c</sup></b>      | 289.3 ± 46.7<br>(208–421) | 292.6 ± 56.0<br>(183–423) | 3.26 ± 36.8 | 0.60    | 276.9 ± 48.2<br>(179.5–388)               | 279.8 ± 46.5<br>(139–376) | 3.00 ± 45.1 | 0.66    |
| <b>HDBS<sup>d</sup></b>          | 6.4 ± 2.1 (1–12)          | 6.7 ± 1.6 (4–11)          | 0.34 ± 1.9  | 0.30    | 5.8 ± 2.1 (0–11)                          | 6.6 ± 2.1 (1–12)          | 0.80 ± 2.1  | 0.01    |

Abbreviations: FV, fruits and vegetables; VM, Veggie Meter®; HDBS, healthy dietary behavior score. Data are displayed as mean ± s.d. (range). Pre-test measures were taken two weeks prior to fathers starting the program. Post-test measures were taken within two weeks of fathers completing the six-week program. Reference period for dietary intakes and behaviors was the prior week. <sup>a</sup>Total fruit included fresh fruit and 100% fruit juice. <sup>b</sup>Total veggies included white potatoes, lettuce, and other veggies. <sup>c</sup>Triplicate VM scans were collected at two separate times seven days apart and averages were calculated. <sup>d</sup>Healthy dietary behavior scores were calculated by summing responses of nine dietary behaviors. Mean change within group for each outcome variable was evaluated using a paired samples t-test (mean change ± s.d.). <sup>e</sup>One total FV outlier was removed from the wait-listed control group pre-test data (n = 45).
