# Supplementary material for: An Evaluation of ¡Haz Espacio Para Papi!, a Culturally Tailored Nutrition and Physical Activity Pilot Program for Mexican-Heritage Fathers
Source: MDPI journal article supplement (doi:10.3390/nu16081153), 2024-04-13
Supplement: s1 [file s1]

**Table S4.** Mixed analysis of variance summary table for potential moderators of fathers' weekly average healthy dietary behavior scores between pre-test and post-test and between treatment (n = 35) and wait-listed control comparison (n = 46) groups.

| Source of variation                    | <i>df</i> | <i>F</i> -value | <i>P</i>         | $\eta^{2a}$ |
|----------------------------------------|-----------|-----------------|------------------|-------------|
| <b>Age</b>                             |           |                 |                  |             |
| Group                                  | 1         | 0.28            | 0.59             | <0.01       |
| Time                                   | 1         | 5.63            | <b>0.02*</b>     | 0.02        |
| Group*Time*Age                         | 1         | 0.17            | 0.68             | <0.01       |
| Total                                  | 161       |                 |                  |             |
| <b>Educational Attainment</b>          |           |                 |                  |             |
| Group                                  | 1         | 1.18            | 0.28             | 0.01        |
| Time                                   | 1         | 7.06            | <b>&lt;0.01*</b> | 0.02        |
| Group*Time*Education                   | 1         | 2.73            | 0.10             | <0.01       |
| Total                                  | 161       |                 |                  |             |
| <b>Number of children in household</b> |           |                 |                  |             |
| Group                                  | 1         | 0.37            | 0.54             | <0.01       |
| Time                                   | 1         | 5.37            | <b>0.02*</b>     | 0.02        |
| Group*Time*Children                    | 1         | 0.87            | 0.35             | <0.01       |
| Total                                  | 161       |                 |                  |             |

Abbreviations:  $\eta^2$ , eta squared; *df*, degrees of freedom. <sup>a</sup>Effect size estimates ( $\eta^2$ ) were very small indicating little differences in outcomes between groups. \*  $p < 0.05$ .
