# Supplementary material for: An Evaluation of ¡Haz Espacio Para Papi!, a Culturally Tailored Nutrition and Physical Activity Pilot Program for Mexican-Heritage Fathers
Source: MDPI journal article supplement (doi:10.3390/nu16081153), 2024-04-13
Supplement: s1 [file s1]

# Appendix A: HEPP Father Nutrition Survey

Start Time: \_\_\_\_\_ AM / PM    Date: \_\_\_\_/\_\_\_\_/\_\_\_\_    Promotora: \_\_\_\_\_

Participant ID #: \_\_\_\_ - \_\_\_\_ - \_\_\_\_ - \_\_\_\_

## Health for You and Your Family

### Father Survey - Pre

F \_\_\_\_\_

Diet (see **answer grid A0**): I would like to ask you some questions about your food (meals and snacks). **Over the past week**, how many times did you eat the following items?

| 1. | Snacks                                                  | How many times in the past week? |
|----|---------------------------------------------------------|----------------------------------|
|    | a. Chips                                                | _____ times                      |
|    | b. Popcorn                                              | _____ times                      |
|    | c. Nuts (almonds, peanuts, pecans, pistachios, etc.)    | _____ times                      |
|    | d. Ice cream (frozen yogurt, snow cone, popsicle, etc.) | _____ times                      |
|    | e. Cookies                                              | _____ times                      |
|    | f. Cake                                                 | _____ times                      |
|    | g. Pie                                                  | _____ times                      |
|    | h. Pastries (sweet bread, donuts, cinnamon roll)        | _____ times                      |
|    | i. Candy (chocolates, lollipop, hard candy, etc.)       | _____ times                      |
| 2. | Fruit                                                   | How many times in the past week? |
|    | a. Fresh fruit (any type)                               | _____ times                      |
|    | b. 100% fruit juice                                     | _____ times                      |

|    |                                                                          |                                         |
|----|--------------------------------------------------------------------------|-----------------------------------------|
| 3. | <b>Vegetables</b>                                                        | <b>How many times in the past week?</b> |
|    | a. White potatoes                                                        | _____ times                             |
|    | b. White rice                                                            | _____ times                             |
|    | c. Iceberg lettuce                                                       | _____ times                             |
|    | d. Vegetables (not counting above items)                                 | _____ times                             |
| 4. | <b>Sugar-sweetened beverages</b>                                         | <b>How many times in the past week?</b> |
|    | a. Soda (Coke, Dr. Pepper, Sprite, Fanta, etc.)                          | _____ times                             |
|    | b. Sugary drinks ( <i>aguas frescas</i> , sweet tea, juice drinks, etc.) | _____ times                             |
|    | c. Sport/energy drinks (Powerade, Gatorade, Red Bull, Monster, etc.)     | _____ times                             |

Nutrition knowledge (see **answer grids A1-A3, ✓ the answer**): I would like to ask you some questions about **nutrition in general**. Please choose the best answer (only one).

**Question #5**

*What information can we learn from MyPlate?*

|                                                                                                                                                |                                                                                                                                                  |                                                                                                                                                |                                                                                                                                                                         |                                                                                                                                                        |
|------------------------------------------------------------------------------------------------------------------------------------------------|--------------------------------------------------------------------------------------------------------------------------------------------------|------------------------------------------------------------------------------------------------------------------------------------------------|-------------------------------------------------------------------------------------------------------------------------------------------------------------------------|--------------------------------------------------------------------------------------------------------------------------------------------------------|
| <input type="checkbox"/>  <p><b>How much food costs</b></p> | <input type="checkbox"/>  <p><b>What foods taste good</b></p> | <input type="checkbox"/>  <p><b>How to prepare food</b></p> | <input type="checkbox"/>  <p><b>How much to eat of different kinds of foods</b></p> | <input type="checkbox"/>  <p><b>I have never seen MyPlate</b></p> |
|------------------------------------------------------------------------------------------------------------------------------------------------|--------------------------------------------------------------------------------------------------------------------------------------------------|------------------------------------------------------------------------------------------------------------------------------------------------|-------------------------------------------------------------------------------------------------------------------------------------------------------------------------|--------------------------------------------------------------------------------------------------------------------------------------------------------|

Question #6

From which food group should you eat the most servings each day?

|                                                                                   |                                                                                   |                                                                                    |                                                                                     |
|-----------------------------------------------------------------------------------|-----------------------------------------------------------------------------------|------------------------------------------------------------------------------------|-------------------------------------------------------------------------------------|
| <input type="checkbox"/>                                                          | <input type="checkbox"/>                                                          | <input type="checkbox"/>                                                           | <input type="checkbox"/>                                                            |
|  |  |  |  |
| Vegetables                                                                        | Meat                                                                              | Fruit                                                                              | Grains                                                                              |

Question #7

Why should we wash fruits and vegetables before we eat them?

|                                                                                    |                                                                                    |                                                                                     |                                                                                      |
|------------------------------------------------------------------------------------|------------------------------------------------------------------------------------|-------------------------------------------------------------------------------------|--------------------------------------------------------------------------------------|
| <input type="checkbox"/>                                                           | <input type="checkbox"/>                                                           | <input type="checkbox"/>                                                            | <input type="checkbox"/>                                                             |
|  |  |  |  |
| To wash off the germs                                                              | Only if they are dirty                                                             | To keep them fresh                                                                  | So they taste better                                                                 |

Question #8

After cooking, how many maximum days should food be in the refrigerator?

|                                                                                     |                                                                                     |                                                                                      |                                                                                       |
|-------------------------------------------------------------------------------------|-------------------------------------------------------------------------------------|--------------------------------------------------------------------------------------|---------------------------------------------------------------------------------------|
| <input type="checkbox"/>                                                            | <input type="checkbox"/>                                                            | <input type="checkbox"/>                                                             | <input type="checkbox"/>                                                              |
|  |  |  |  |
| 1 day                                                                               | 3 days                                                                              | 5 days                                                                               | Don't know                                                                            |

Question #9

Why should we **not** eat foods that have been sitting out for more than 2 hours?

|                                                                                                                                                                 |                                                                                                                                                |                                                                                                                                                  |                                                                                                                                                 |
|-----------------------------------------------------------------------------------------------------------------------------------------------------------------|------------------------------------------------------------------------------------------------------------------------------------------------|--------------------------------------------------------------------------------------------------------------------------------------------------|-------------------------------------------------------------------------------------------------------------------------------------------------|
| <input type="checkbox"/><br><br>The vitamins break down and become bad for you | <input type="checkbox"/><br><br>The color of the food changes | <input type="checkbox"/><br><br>Germs grow on the food quickly | <input type="checkbox"/><br><br>The food starts to taste bad |
|-----------------------------------------------------------------------------------------------------------------------------------------------------------------|------------------------------------------------------------------------------------------------------------------------------------------------|--------------------------------------------------------------------------------------------------------------------------------------------------|-------------------------------------------------------------------------------------------------------------------------------------------------|

Question #10

With what should you fill half your plate?

|                                                                                                                                         |                                                                                                                           |                                                                                                                           |                                                                                                                             |
|-----------------------------------------------------------------------------------------------------------------------------------------|---------------------------------------------------------------------------------------------------------------------------|---------------------------------------------------------------------------------------------------------------------------|-----------------------------------------------------------------------------------------------------------------------------|
| <input type="checkbox"/><br><br>Fruits and vegetables | <input type="checkbox"/><br><br>Protein | <input type="checkbox"/><br><br>Grains | <input type="checkbox"/><br><br>Dessert |
|-----------------------------------------------------------------------------------------------------------------------------------------|---------------------------------------------------------------------------------------------------------------------------|---------------------------------------------------------------------------------------------------------------------------|-----------------------------------------------------------------------------------------------------------------------------|

Question #11

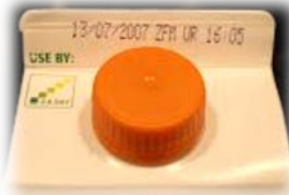

How often do you check the 'Use by' date on food packages?

|                                |                                    |                                 |
|--------------------------------|------------------------------------|---------------------------------|
| <input type="checkbox"/> Never | <input type="checkbox"/> Sometimes | <input type="checkbox"/> Always |
|--------------------------------|------------------------------------|---------------------------------|

Question #12

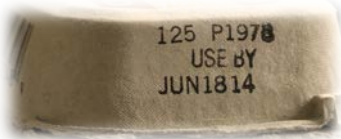

How often do you prepare/eat food past its 'Use by' date?

|                                |                                    |                                 |
|--------------------------------|------------------------------------|---------------------------------|
| <input type="checkbox"/> Never | <input type="checkbox"/> Sometimes | <input type="checkbox"/> Always |
|--------------------------------|------------------------------------|---------------------------------|

Question #13

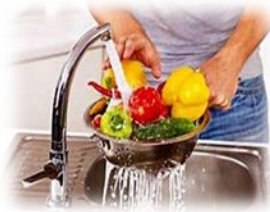

How often do you wash fruits and vegetables that **don't need** to be peeled before eating?

|                                |                                    |                                 |
|--------------------------------|------------------------------------|---------------------------------|
| <input type="checkbox"/> Never | <input type="checkbox"/> Sometimes | <input type="checkbox"/> Always |
|--------------------------------|------------------------------------|---------------------------------|

Question #14

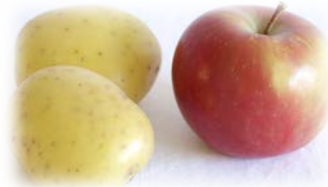

How often do you wash fruits and vegetables that **need** to be peeled before eating?

|                                |                                    |                                 |
|--------------------------------|------------------------------------|---------------------------------|
| <input type="checkbox"/> Never | <input type="checkbox"/> Sometimes | <input type="checkbox"/> Always |
|--------------------------------|------------------------------------|---------------------------------|

Liking and Variety: For the following questions, I am going to ask you whether you have eaten any of the following **fruits in the past month** and **what you think about each of them** (see **answer grid A4**, ✓ the answer and place X in box).

**Question #15**

*Fruits*

| <b>Fruit</b><br><br>What do you think about each of them?                                                        | <br><b>Eaten in past month?</b> | <br><b>Like</b> | <br><b>Depends (Preparation)</b> | <br><b>Dislike</b> | <br><b>Never tried</b> |
|------------------------------------------------------------------------------------------------------------------|------------------------------------------------------------------------------------------------------------------|--------------------------------------------------------------------------------------------------|-------------------------------------------------------------------------------------------------------------------|-------------------------------------------------------------------------------------------------------|-----------------------------------------------------------------------------------------------------------|
| <b>a. Peaches</b><br><br>       | <input type="checkbox"/> Yes<br><input type="checkbox"/> No                                                      | Like                                                                                             | Depends                                                                                                           | Dislike                                                                                               | Never tried                                                                                               |
| <b>b. Strawberries</b><br><br> | <input type="checkbox"/> Yes<br><input type="checkbox"/> No                                                      | Like                                                                                             | Depends                                                                                                           | Dislike                                                                                               | Never tried                                                                                               |
| <b>c. Guava</b><br><br>       | <input type="checkbox"/> Yes<br><input type="checkbox"/> No                                                      | Like                                                                                             | Depends                                                                                                           | Dislike                                                                                               | Never tried                                                                                               |
| <b>d. Lime/Lemon</b><br><br>  | <input type="checkbox"/> Yes<br><input type="checkbox"/> No                                                      | Like                                                                                             | Depends                                                                                                           | Dislike                                                                                               | Never tried                                                                                               |
| <b>e. Tangerines</b><br><br>  | <input type="checkbox"/> Yes<br><input type="checkbox"/> No                                                      | Like                                                                                             | Depends                                                                                                           | Dislike                                                                                               | Never tried                                                                                               |



| <p><b><u>Fruit</u></b></p> <p>What do you think about each of them?</p>                                                                   |  <p>Eaten in past month?</p> |  <p>Like</p> |  <p>Depends (Preparation)</p> |  <p>Dislike</p> |  <p>Never tried</p> |
|-------------------------------------------------------------------------------------------------------------------------------------------|---------------------------------------------------------------------------------------------------------------|-----------------------------------------------------------------------------------------------|----------------------------------------------------------------------------------------------------------------|----------------------------------------------------------------------------------------------------|--------------------------------------------------------------------------------------------------------|
| <p><b>f. Mango</b></p>                                   | <input type="checkbox"/> Yes<br><input type="checkbox"/> No                                                   | Like                                                                                          | Depends                                                                                                        | Dislike                                                                                            | Never tried                                                                                            |
| <p><b>g. Apples</b></p>                                  | <input type="checkbox"/> Yes<br><input type="checkbox"/> No                                                   | Like                                                                                          | Depends                                                                                                        | Dislike                                                                                            | Never tried                                                                                            |
| <p><b>h. Melon</b></p>                                  | <input type="checkbox"/> Yes<br><input type="checkbox"/> No                                                   | Like                                                                                          | Depends                                                                                                        | Dislike                                                                                            | Never tried                                                                                            |
| <p><b>i. Oranges</b></p>                               | <input type="checkbox"/> Yes<br><input type="checkbox"/> No                                                   | Like                                                                                          | Depends                                                                                                        | Dislike                                                                                            | Never tried                                                                                            |
| <p><b>j. Other berries (blueberry, raspberry)</b></p>  | <input type="checkbox"/> Yes<br><input type="checkbox"/> No                                                   | Like                                                                                          | Depends                                                                                                        | Dislike                                                                                            | Never tried                                                                                            |
| <p><b>k. Papaya</b></p>                                | <input type="checkbox"/> Yes<br><input type="checkbox"/> No                                                   | Like                                                                                          | Depends                                                                                                        | Dislike                                                                                            | Never tried                                                                                            |

| <b>Fruit</b><br><br>What do you think about each of them?                                                   | <br><b>Eaten in past month?</b> | <br><b>Like</b> | <br><b>Depends (Preparation)</b> | <br><b>Dislike</b> | <br><b>Never tried</b> |
|-------------------------------------------------------------------------------------------------------------|------------------------------------------------------------------------------------------------------------------|--------------------------------------------------------------------------------------------------|-------------------------------------------------------------------------------------------------------------------|-------------------------------------------------------------------------------------------------------|-----------------------------------------------------------------------------------------------------------|
| <b>l. Pears</b><br>        | <input type="checkbox"/> Yes<br><input type="checkbox"/> No                                                      | Like                                                                                             | Depends                                                                                                           | Dislike                                                                                               | Never tried                                                                                               |
| <b>m. Pineapple</b><br>    | <input type="checkbox"/> Yes<br><input type="checkbox"/> No                                                      | Like                                                                                             | Depends                                                                                                           | Dislike                                                                                               | Never tried                                                                                               |
| <b>n. Banana</b><br>      | <input type="checkbox"/> Yes<br><input type="checkbox"/> No                                                      | Like                                                                                             | Depends                                                                                                           | Dislike                                                                                               | Never tried                                                                                               |
| <b>o. Plantain</b><br>   | <input type="checkbox"/> Yes<br><input type="checkbox"/> No                                                      | Like                                                                                             | Depends                                                                                                           | Dislike                                                                                               | Never tried                                                                                               |
| <b>p. Grapefruit</b><br> | <input type="checkbox"/> Yes<br><input type="checkbox"/> No                                                      | Like                                                                                             | Depends                                                                                                           | Dislike                                                                                               | Never tried                                                                                               |
| <b>q. Grapes</b><br>     | <input type="checkbox"/> Yes<br><input type="checkbox"/> No                                                      | Like                                                                                             | Depends                                                                                                           | Dislike                                                                                               | Never tried                                                                                               |



| <p><b><u>Fruit</u></b></p> <p><b>What do you think about each of them?</b></p>                                                |  <p><b>Eaten in past month?</b></p> |  <p><b>Like</b></p> |  <p><b>Depends (Preparation)</b></p> |  <p><b>Dislike</b></p> |  <p><b>Never tried</b></p> |
|-------------------------------------------------------------------------------------------------------------------------------|----------------------------------------------------------------------------------------------------------------------|------------------------------------------------------------------------------------------------------|-----------------------------------------------------------------------------------------------------------------------|-----------------------------------------------------------------------------------------------------------|---------------------------------------------------------------------------------------------------------------|
| <p><b>r. 100% fruit juice - Apple</b></p>    | <p><input type="checkbox"/> Yes</p> <p><input type="checkbox"/> No</p>                                               | Like                                                                                                 | Depends                                                                                                               | Dislike                                                                                                   | Never tried                                                                                                   |
| <p><b>s. 100% fruit juice - Orange</b></p>  | <p><input type="checkbox"/> Yes</p> <p><input type="checkbox"/> No</p>                                               | Like                                                                                                 | Depends                                                                                                               | Dislike                                                                                                   | Never tried                                                                                                   |
| <p><b>t. 100% fruit juice - Other</b></p>  | <p><input type="checkbox"/> Yes</p> <p><input type="checkbox"/> No</p>                                               | Like                                                                                                 | Depends                                                                                                               | Dislike                                                                                                   | Never tried                                                                                                   |

Liking and Variety: For the following questions, I am going to ask you whether you have eaten any of the following vegetables **in the past month** and **what you think about each of them** (see **answer grid A4**, ✓ the answer and place X in box).

**Question #16**

*Vegetables*

| <b><u>Vegetable</u></b><br><br>What do you think about each of them?                                      | <br><b>Eaten in past month?</b> | <br><b>Like</b> | <br><b>Depends (Preparation)</b> | <br><b>Dislike</b> | <br><b>Never tried</b> |
|-----------------------------------------------------------------------------------------------------------|------------------------------------------------------------------------------------------------------------------|--------------------------------------------------------------------------------------------------|-------------------------------------------------------------------------------------------------------------------|-------------------------------------------------------------------------------------------------------|-----------------------------------------------------------------------------------------------------------|
| <b>a. Avocado</b><br>    | <input type="checkbox"/> Yes<br><input type="checkbox"/> No                                                      | Like                                                                                             | Depends                                                                                                           | Dislike                                                                                               | Never tried                                                                                               |
| <b>b. Garlic</b><br>    | <input type="checkbox"/> Yes<br><input type="checkbox"/> No                                                      | Like                                                                                             | Depends                                                                                                           | Dislike                                                                                               | Never tried                                                                                               |
| <b>c. Celery</b><br>   | <input type="checkbox"/> Yes<br><input type="checkbox"/> No                                                      | Like                                                                                             | Depends                                                                                                           | Dislike                                                                                               | Never tried                                                                                               |
| <b>d. Beets</b><br>    | <input type="checkbox"/> Yes<br><input type="checkbox"/> No                                                      | Like                                                                                             | Depends                                                                                                           | Dislike                                                                                               | Never tried                                                                                               |
| <b>e. Broccoli</b><br> | <input type="checkbox"/> Yes<br><input type="checkbox"/> No                                                      | Like                                                                                             | Depends                                                                                                           | Dislike                                                                                               | Never tried                                                                                               |

| <b><u>Vegetable</u></b><br><br>What do you think about each of them?                                                            | <br><b>Eaten in past month?</b> | <br><b>Like</b> | <br><b>Depends (Preparation)</b> | <br><b>Dislike</b> | <br><b>Never tried</b> |
|---------------------------------------------------------------------------------------------------------------------------------|------------------------------------------------------------------------------------------------------------------|--------------------------------------------------------------------------------------------------|-------------------------------------------------------------------------------------------------------------------|-------------------------------------------------------------------------------------------------------|-----------------------------------------------------------------------------------------------------------|
| <b>f. Squash (any kind)</b><br><br>            | <input type="checkbox"/> Yes<br><input type="checkbox"/> No                                                      | Like                                                                                             | Depends                                                                                                           | Dislike                                                                                               | Never tried                                                                                               |
| <b>g. Pumpkin</b><br><br>                      | <input type="checkbox"/> Yes<br><input type="checkbox"/> No                                                      | Like                                                                                             | Depends                                                                                                           | Dislike                                                                                               | Never tried                                                                                               |
| <b>h. Sweet potato</b><br><br>               | <input type="checkbox"/> Yes<br><input type="checkbox"/> No                                                      | Like                                                                                             | Depends                                                                                                           | Dislike                                                                                               | Never tried                                                                                               |
| <b>i. Onions (green, white, red)</b><br><br> | <input type="checkbox"/> Yes<br><input type="checkbox"/> No                                                      | Like                                                                                             | Depends                                                                                                           | Dislike                                                                                               | Never tried                                                                                               |
| <b>j. Peas (any kind)</b><br><br>            | <input type="checkbox"/> Yes<br><input type="checkbox"/> No                                                      | Like                                                                                             | Depends                                                                                                           | Dislike                                                                                               | Never tried                                                                                               |

| <b><u>Vegetable</u></b><br><br>What do you think about each of them?                                                                                 | <br><b>Eaten in past month?</b> | <br><b>Like</b> | <br><b>Depends (Preparation)</b> | <br><b>Dislike</b> | <br><b>Never tried</b> |
|------------------------------------------------------------------------------------------------------------------------------------------------------|------------------------------------------------------------------------------------------------------------------|--------------------------------------------------------------------------------------------------|-------------------------------------------------------------------------------------------------------------------|-------------------------------------------------------------------------------------------------------|-----------------------------------------------------------------------------------------------------------|
| <b>k. Bell pepper</b><br>                                           | <input type="checkbox"/> Yes<br><input type="checkbox"/> No                                                      | Like                                                                                             | Depends                                                                                                           | Dislike                                                                                               | Never tried                                                                                               |
| <b>l. Hot peppers</b><br>                                           | <input type="checkbox"/> Yes<br><input type="checkbox"/> No                                                      | Like                                                                                             | Depends                                                                                                           | Dislike                                                                                               | Never tried                                                                                               |
| <b>m. Cauliflower</b><br>                                          | <input type="checkbox"/> Yes<br><input type="checkbox"/> No                                                      | Like                                                                                             | Depends                                                                                                           | Dislike                                                                                               | Never tried                                                                                               |
| <b>n. Green beans</b><br>                                         | <input type="checkbox"/> Yes<br><input type="checkbox"/> No                                                      | Like                                                                                             | Depends                                                                                                           | Dislike                                                                                               | Never tried                                                                                               |
| <b>o. Corn</b><br>                                                | <input type="checkbox"/> Yes<br><input type="checkbox"/> No                                                      | Like                                                                                             | Depends                                                                                                           | Dislike                                                                                               | Never tried                                                                                               |
| <b>p. Spinach, chard or kale (dark green or leafy greens)</b><br> | <input type="checkbox"/> Yes<br><input type="checkbox"/> No                                                      | Like                                                                                             | Depends                                                                                                           | Dislike                                                                                               | Never tried                                                                                               |

| <b><u>Vegetable</u></b><br><br><b>What do you think about each of them?</b>                                                         | <br><b>Eaten in past month?</b> | <br><b>Like</b> | <br><b>Depends (Preparation)</b> | <br><b>Dislike</b> | <br><b>Never tried</b> |
|-------------------------------------------------------------------------------------------------------------------------------------|------------------------------------------------------------------------------------------------------------------|--------------------------------------------------------------------------------------------------|-------------------------------------------------------------------------------------------------------------------|-------------------------------------------------------------------------------------------------------|-----------------------------------------------------------------------------------------------------------|
| <b>q. Beans (garbanzo, black beans, pinto)</b><br> | <input type="checkbox"/> Yes<br><input type="checkbox"/> No                                                      | Like                                                                                             | Depends                                                                                                           | Dislike                                                                                               | Never tried                                                                                               |
| <b>r. Jicama</b><br>                               | <input type="checkbox"/> Yes<br><input type="checkbox"/> No                                                      | Like                                                                                             | Depends                                                                                                           | Dislike                                                                                               | Never tried                                                                                               |
| <b>s. Iceberg lettuce</b><br>                    | <input type="checkbox"/> Yes<br><input type="checkbox"/> No                                                      | Like                                                                                             | Depends                                                                                                           | Dislike                                                                                               | Never tried                                                                                               |
| <b>t. Romaine lettuce</b><br>                    | <input type="checkbox"/> Yes<br><input type="checkbox"/> No                                                      | Like                                                                                             | Depends                                                                                                           | Dislike                                                                                               | Never tried                                                                                               |
| <b>u. Nopales</b><br>                            | <input type="checkbox"/> Yes<br><input type="checkbox"/> No                                                      | Like                                                                                             | Depends                                                                                                           | Dislike                                                                                               | Never tried                                                                                               |

| <b>Vegetable</b><br>What do you think about each of them?                                                       | <br><b>Eaten in past month?</b> | <br><b>Like</b> | <br><b>Depends (Preparation)</b> | <br><b>Dislike</b> | <br><b>Never tried</b> |
|-----------------------------------------------------------------------------------------------------------------|------------------------------------------------------------------------------------------------------------------|--------------------------------------------------------------------------------------------------|-------------------------------------------------------------------------------------------------------------------|-------------------------------------------------------------------------------------------------------|-----------------------------------------------------------------------------------------------------------|
| <b>v. Potatoes – white</b><br> | <input type="checkbox"/> Yes<br><input type="checkbox"/> No                                                      | Like                                                                                             | Depends                                                                                                           | Dislike                                                                                               | Never tried                                                                                               |
| <b>w. Cucumber</b><br>         | <input type="checkbox"/> Yes<br><input type="checkbox"/> No                                                      | Like                                                                                             | Depends                                                                                                           | Dislike                                                                                               | Never tried                                                                                               |
| <b>x. Cabbage</b><br>         | <input type="checkbox"/> Yes<br><input type="checkbox"/> No                                                      | Like                                                                                             | Depends                                                                                                           | Dislike                                                                                               | Never tried                                                                                               |
| <b>y. Tomato</b><br>         | <input type="checkbox"/> Yes<br><input type="checkbox"/> No                                                      | Like                                                                                             | Depends                                                                                                           | Dislike                                                                                               | Never tried                                                                                               |
| <b>z. Yucca</b><br>          | <input type="checkbox"/> Yes<br><input type="checkbox"/> No                                                      | Like                                                                                             | Depends                                                                                                           | Dislike                                                                                               | Never tried                                                                                               |
| <b>aa. Carrots</b><br>       | <input type="checkbox"/> Yes<br><input type="checkbox"/> No                                                      | Like                                                                                             | Depends                                                                                                           | Dislike                                                                                               | Never tried                                                                                               |

Cooking Practices: I would like to ask you more about **cooking in general**. Please answer Yes, Sometimes, or No for each of the following questions [see **answer grid A5**] (place X in box).

|                                                                                                                                  | Yes | Sometimes | No |
|----------------------------------------------------------------------------------------------------------------------------------|-----|-----------|----|
| <b>17.</b> Do you feel limited by your lack of cooking knowledge?                                                                | Yes | Sometimes | No |
| <b>18.</b> Can you always manage to decide what you would like to eat at any given time?                                         | Yes | Sometimes | No |
| <b>19.</b> When preparing/cooking food, are you confident that you can resolve unexpected results (didn't turn out as expected)? | Yes | Sometimes | No |
| <b>20.</b> When preparing/cooking food, is it easy for you to accomplish your desired results?                                   | Yes | Sometimes | No |
| <b>21.</b> When preparing/cooking food, can you resolve most problems that come up?                                              | Yes | Sometimes | No |
| <b>22.</b> Are you comfortable preparing food?                                                                                   | Yes | Sometimes | No |
| <b>23.</b> Do you know how to use the kitchen equipment you have?                                                                | Yes | Sometimes | No |
| <b>24.</b> Are you involved in daily meal preparation?                                                                           | Yes | Sometimes | No |
| <b>25.</b> When you shop for food, do you know how you will use the ingredients you are purchasing?                              | Yes | Sometimes | No |
| <b>26.</b> Are you confident making meals from the ingredients you have on hand?                                                 | Yes | Sometimes | No |
| <b>27.</b> Before you start cooking, do you usually have a mental plan of all the steps you will follow?                         | Yes | Sometimes | No |
| <b>28.</b> When presented with two similar products to purchase, do you feel confident choosing between them?                    | Yes | Sometimes | No |
| <b>29.</b> When you go shopping, do you know where to find the ingredients you need to prepare a meal?                           | Yes | Sometimes | No |



Cooking Thoughts: I would like to ask you about **your thoughts about cooking**. Please answer Yes, Sometimes, or No for each of the following questions [see **answer grid A5**] (place X in box).

|                                                                                                                      | Yes | Sometimes | No |
|----------------------------------------------------------------------------------------------------------------------|-----|-----------|----|
| <b>30.</b> For you, is cooking an activity that makes you feel good?                                                 | Yes | Sometimes | No |
| <b>31.</b> For you, is cooking only something to get through as quickly as possible?                                 | Yes | Sometimes | No |
| <b>32.</b> Do you feel that cooking brings you little enjoyment compared to other activities?                        | Yes | Sometimes | No |
| <b>33.</b> If you try making a new type of food and it does not come out right, do you usually try to make it again? | Yes | Sometimes | No |
| <b>34.</b> Do you think a lot about what you will cook or eat?                                                       | Yes | Sometimes | No |
| <b>35.</b> Do you prefer to spend your time on more important things than on cooking?                                | Yes | Sometimes | No |
| <b>36.</b> Normally, do you prefer to cook rather than to have someone else prepare the food?                        | Yes | Sometimes | No |
| <b>37.</b> Do you think food made at home is more affordable?                                                        | Yes | Sometimes | No |
| <b>38.</b> Do you get inspired to cook for other people, like your family or friends?                                | Yes | Sometimes | No |
| <b>39.</b> For you, is it a burden to have to cook for other people, like your family or friends?                    | Yes | Sometimes | No |
| <b>40.</b> Do you feel that you don't like to cook because it takes too much time?                                   | Yes | Sometimes | No |
| <b>41.</b> Is cooking frustrating?                                                                                   | Yes | Sometimes | No |
| <b>42.</b> Do you find cooking tiring?                                                                               | Yes | Sometimes | No |
| <b>43.</b> Does it take too much work to cook?                                                                       | Yes | Sometimes | No |

Cooking Time: I would like to ask you about your **time for cooking**. Please answer Yes, Sometimes, or No for each of the following questions [see **answer grid A5**] (place X in box).

|                                                                                                                                | Yes | Sometimes | No |
|--------------------------------------------------------------------------------------------------------------------------------|-----|-----------|----|
| <b>44.</b> Would you like to have more time to plan meals?                                                                     | Yes | Sometimes | No |
| <b>45.</b> Is it difficult for you to make time to prepare the food you would like to eat?                                     | Yes | Sometimes | No |
| <b>46.</b> Do your family responsibilities prevent you from having the time to prepare meals?                                  | Yes | Sometimes | No |
| <b>47.</b> Do your other activities (church, social events, volunteer time) prevent you from having the time to prepare meals? | Yes | Sometimes | No |
| <b>48.</b> Do your job responsibilities prevent you from having the time to prepare meals?                                     | Yes | Sometimes | No |

**1<sup>st</sup> BREAK:** \_\_\_\_\_

Start Time: \_\_\_\_\_ AM / PM

End Time: \_\_\_\_\_ AM / PM

Family Food Practices: I would like to ask you a few questions about **family meals**. The first five questions are about \_\_\_\_\_ and the rest are about you. **During the past month**, how often did you do the following [see **answer grid A6**] (place X in box)?

| How often...?                                                         | Never | Once in a while | Almost every day |
|-----------------------------------------------------------------------|-------|-----------------|------------------|
| <b>49.</b> Did you talk to _____ about eating healthy foods?          | Never | Once in a while | Almost every day |
| <b>50.</b> Did you take _____ with you to the store to buy groceries? | Never | Once in a while | Almost every day |
| <b>51.</b> Did you sit down to eat with _____?                        | Never | Once in a while | Almost every day |
| <b>52.</b> Did you ask _____ to help you prepare dinner?              | Never | Once in a while | Almost every day |
| <b>53.</b> Did you ask _____ to help you plan meals?                  | Never | Once in a while | Almost every day |

| How often...?                                                                                                                                                     | Never | Once in a while | Almost every day |
|-------------------------------------------------------------------------------------------------------------------------------------------------------------------|-------|-----------------|------------------|
| <b>54.</b> Did you prepare meals with everything homemade (basic ingredients)?                                                                                    | Never | Once in a while | Almost every day |
| <b>55.</b> Did you only use prepared foods (rotisserie chicken, pizza, bagged salad, prepared mashed potatoes, etc.) to make a meal?                              | Never | Once in a while | Almost every day |
| <b>56.</b> Did you combine both prepared foods (rotisserie chicken, pizza, bagged salad, prepared mashed potatoes, etc.) with homemade food items to make a meal? | Never | Once in a while | Almost every day |
| <b>57.</b> Did you reheat leftovers to use as all or part of another meal?                                                                                        | Never | Once in a while | Almost every day |
| <b>58.</b> Did you use leftovers from a home cooked meal to <u>create</u> a different dish?                                                                       | Never | Once in a while | Almost every day |
| <b>59.</b> Did you use leftovers from a meal away from home (church, family, restaurant, etc.) to <u>create</u> a different dish?                                 | Never | Once in a while | Almost every day |
| <b>60.</b> Did you eat breakfast away from home?                                                                                                                  | Never | Once in a while | Almost every day |
| <b>61.</b> Did you eat lunch away from home?                                                                                                                      | Never | Once in a while | Almost every day |
| <b>62.</b> Did you eat dinner away from home?                                                                                                                     | Never | Once in a while | Almost every day |

Confidence: For the following questions, I am going to ask you how confident you feel in preparing the following food items to use them in your meals [see **answer grid A7**] (**place X in box**).

**Question #63**

*Confidence*

| <p><b><u>Food Item</u></b></p> <p>How <u>confident</u> do you feel in preparing/cooking the following food items to use them in your meals?</p> | <p><br/><b>Unconfident</b></p> | <p><br/><b>Not sure</b></p> | <p><br/><b>Confident</b></p> |
|-------------------------------------------------------------------------------------------------------------------------------------------------|-----------------------------------------------------------------------------------------------------------------|---------------------------------------------------------------------------------------------------------------|-----------------------------------------------------------------------------------------------------------------|
| <p><b>a. Avocado</b></p>                                       | Unconfident                                                                                                     | Not sure                                                                                                      | Confident                                                                                                       |
| <p><b>b. Celery</b></p>                                        | Unconfident                                                                                                     | Not sure                                                                                                      | Confident                                                                                                       |
| <p><b>c. Beets</b></p>                                       | Unconfident                                                                                                     | Not sure                                                                                                      | Confident                                                                                                       |
| <p><b>d. Broccoli</b></p>                                    | Unconfident                                                                                                     | Not sure                                                                                                      | Confident                                                                                                       |
| <p><b>e. Pumpkin</b></p>                                     | Unconfident                                                                                                     | Not sure                                                                                                      | Confident                                                                                                       |
| <p><b>f. Squash (any kind)</b></p>                           | Unconfident                                                                                                     | Not sure                                                                                                      | Confident                                                                                                       |

| <p><b><u>Food Item</u></b></p> <p>How <b>confident</b> do you feel in preparing/cooking the following food items to use them in your meals?</p>          |  <p><b>Unconfident</b></p> |  <p><b>Not sure</b></p> |  <p><b>Confident</b></p> |
|----------------------------------------------------------------------------------------------------------------------------------------------------------|-------------------------------------------------------------------------------------------------------------|-----------------------------------------------------------------------------------------------------------|-------------------------------------------------------------------------------------------------------------|
| <p><b>g. Sweet potato</b></p>                                           | Unconfident                                                                                                 | Not sure                                                                                                  | Confident                                                                                                   |
| <p><b>h. Onions (green, white, red)</b></p>                             | Unconfident                                                                                                 | Not sure                                                                                                  | Confident                                                                                                   |
| <p><b>i. Peas (any kind)</b></p>                                        | Unconfident                                                                                                 | Not sure                                                                                                  | Confident                                                                                                   |
| <p><b>j. Cauliflower</b></p>                                          | Unconfident                                                                                                 | Not sure                                                                                                  | Confident                                                                                                   |
| <p><b>k. Green beans</b></p>                                          | Unconfident                                                                                                 | Not sure                                                                                                  | Confident                                                                                                   |
| <p><b>l. Corn</b></p>                                                 | Unconfident                                                                                                 | Not sure                                                                                                  | Confident                                                                                                   |
| <p><b>m. Spinach, chard or kale (dark green or leafy greens)</b></p>  | Unconfident                                                                                                 | Not sure                                                                                                  | Confident                                                                                                   |

| <p><b><u>Food Item</u></b></p> <p>How <b><u>confident</u></b> do you feel in preparing/cooking the following food items to use them in your meals?</p> | <p><br/><b>Unconfident</b></p> | <p><br/><b>Not sure</b></p> | <p><br/><b>Confident</b></p> |
|--------------------------------------------------------------------------------------------------------------------------------------------------------|-----------------------------------------------------------------------------------------------------------------|---------------------------------------------------------------------------------------------------------------|-----------------------------------------------------------------------------------------------------------------|
| <p><b>n. Beans(garbanzo, black beans, pinto)</b></p>                  | Unconfident                                                                                                     | Not sure                                                                                                      | Confident                                                                                                       |
| <p><b>o. Jicama</b></p>                                               | Unconfident                                                                                                     | Not sure                                                                                                      | Confident                                                                                                       |
| <p><b>p. Iceberg lettuce</b></p>                                      | Unconfident                                                                                                     | Not sure                                                                                                      | Confident                                                                                                       |
| <p><b>q. Romaine lettuce</b></p>                                    | Unconfident                                                                                                     | Not sure                                                                                                      | Confident                                                                                                       |
| <p><b>r. Cucumber</b></p>                                           | Unconfident                                                                                                     | Not sure                                                                                                      | Confident                                                                                                       |
| <p><b>s. Cabbage</b></p>                                            | Unconfident                                                                                                     | Not sure                                                                                                      | Confident                                                                                                       |
| <p><b>t. Mixed vegetables (in stews, casseroles, or sides)</b></p>  | Unconfident                                                                                                     | Not sure                                                                                                      | Confident                                                                                                       |

Confidence: For the following questions, I am going to ask you how confident you feel in doing the following activities [see **answer grid A7**] (**place X in box**).

### Question #64

#### Confidence

| How confident do you feel to...?                                                                   | <br>Unconfident | <br>Not sure | <br>Confident |
|----------------------------------------------------------------------------------------------------|--------------------------------------------------------------------------------------------------|-------------------------------------------------------------------------------------------------|--------------------------------------------------------------------------------------------------|
| <b>a.</b> Wash your hands for at least 20 seconds <u>before</u> and <u>during</u> food preparation | Unconfident                                                                                      | Not sure                                                                                        | Confident                                                                                        |
| <b>b.</b> Plan or help decide which meals will be made at home                                     | Unconfident                                                                                      | Not sure                                                                                        | Confident                                                                                        |
| <b>c.</b> Grocery shop for your family (e.g., choosing and purchasing foods at the store)          | Unconfident                                                                                      | Not sure                                                                                        | Confident                                                                                        |
| <b>d.</b> Clean or wash fruits and vegetables before using and cooking                             | Unconfident                                                                                      | Not sure                                                                                        | Confident                                                                                        |
| <b>e.</b> Prepare fruits in different ways (juicing, pureeing, and chopping)                       | Unconfident                                                                                      | Not sure                                                                                        | Confident                                                                                        |
| <b>f.</b> Prepare a salad with homemade dressing                                                   | Unconfident                                                                                      | Not sure                                                                                        | Confident                                                                                        |
| <b>g.</b> Make beverages at home with vegetables and fruit <b>without added sugar</b>              | Unconfident                                                                                      | Not sure                                                                                        | Confident                                                                                        |
| <b>h.</b> Prepare snacks at home for your children with vegetables and fruit                       | Unconfident                                                                                      | Not sure                                                                                        | Confident                                                                                        |
| <b>i.</b> Make vegetable-focused dishes at home                                                    | Unconfident                                                                                      | Not sure                                                                                        | Confident                                                                                        |
| <b>j.</b> Use herbs and spices (like basil, cilantro, garlic)                                      | Unconfident                                                                                      | Not sure                                                                                        | Confident                                                                                        |
| <b>k.</b> Prepare meals with everything homemade (basic ingredients)                               | Unconfident                                                                                      | Not sure                                                                                        | Confident                                                                                        |
| <b>l.</b> Prepare foods with what you have at home                                                 | Unconfident                                                                                      | Not sure                                                                                        | Confident                                                                                        |
| <b>m.</b> Suggest a new dish or recipe to prepare at home                                          | Unconfident                                                                                      | Not sure                                                                                        | Confident                                                                                        |
| <b>n.</b> Package up and store leftover food safely (for eating later)                             | Unconfident                                                                                      | Not sure                                                                                        | Confident                                                                                        |
| <b>o.</b> Eat vegetables as a snack                                                                | Unconfident                                                                                      | Not sure                                                                                        | Confident                                                                                        |



Availability of Fruits and Vegetables: Thinking about **a normal week**, please answer Never, Once in a while, or Almost every day to each of the following questions [see **answer grid A8**] (**place X in box**).

**Question #65**

*Availability*

| How often...?                                                                                    | Never | Once in a while | Almost every day |
|--------------------------------------------------------------------------------------------------|-------|-----------------|------------------|
| a. Do you eat meals that include vegetables as a family?                                         | Never | Once in a while | Almost every day |
| b. Do you have fruit as dessert with meals?                                                      | Never | Once in a while | Almost every day |
| c. Do you encourage _____ to eat vegetables by eating them yourself?                             | Never | Once in a while | Almost every day |
| d. Is there fruit available in your home to have as a snack?                                     | Never | Once in a while | Almost every day |
| e. Are there vegetables available in your home to have as a snack?                               | Never | Once in a while | Almost every day |
| f. Is there cut-up fruit at hand in the refrigerator to eat as a snack?                          | Never | Once in a while | Almost every day |
| g. Are there cut-up vegetables at hand in the refrigerator to eat as a snack?                    | Never | Once in a while | Almost every day |
| h. Is there fresh fruit on the counter, table, or somewhere else where you can easily get to it? | Never | Once in a while | Almost every day |
| i. Do you include _____ when you prepare a meal?                                                 | Never | Once in a while | Almost every day |
| j. Do you encourage _____ to eat more fruit?                                                     | Never | Once in a while | Almost every day |
| k. Do you encourage _____ to eat more vegetables?                                                | Never | Once in a while | Almost every day |
| l. Do you help your wife/partner prepare a meal?                                                 | Never | Once in a while | Almost every day |

| How often...?                                                                                                     | Never | Once in a while | Almost every day |
|-------------------------------------------------------------------------------------------------------------------|-------|-----------------|------------------|
| <b>m.</b> Do you eat while watching TV or using electronics (computer, cell phone, tablet, etc.)?                 | Never | Once in a while | Almost every day |
| <b>n.</b> Does _____ eat while watching TV or using electronics (computer, cell phone, tablet, etc.)?             | Never | Once in a while | Almost every day |
| <b>o.</b> Does your wife/partner eat while watching TV or using electronics (computer, cell phone, tablet, etc.)? | Never | Once in a while | Almost every day |

For the next question, we're going to talk about **when you eat at home** [see answer grid A9] (place X in box).

|            |                                                                                                                | Never | Once in a while | Almost every day | Where in your home? |
|------------|----------------------------------------------------------------------------------------------------------------|-------|-----------------|------------------|---------------------|
| <b>66.</b> | <b>a.</b> How often do you eat at home?                                                                        | Never | Once in a while | Almost every day |                     |
|            | <b>b.</b> How often do you eat <u>somewhere else in your home</u> (different from what you already mentioned)? | Never | Once in a while | Almost every day |                     |

|                                    |                         |
|------------------------------------|-------------------------|
| <b>2<sup>nd</sup> BREAK:</b> _____ |                         |
| Start Time: _____ AM / PM          | End Time: _____ AM / PM |

Child Activities: During the past week, has \_\_\_\_\_ done the following on his/her own? If so, how many times [see answer grid A10] (place X in box)?

**Question #67**

*Child Activities*

| Has _____ done the following on his/her own?               | No | Yes | If yes, how many times in the past week? |
|------------------------------------------------------------|----|-----|------------------------------------------|
| a. Helped plan or decide which meals would be made at home | No | Yes | _____ times                              |
| b. Helped with grocery shopping                            | No | Yes | _____ times                              |
| c. Made snacks with fruit                                  | No | Yes | _____ times                              |
| d. Made snacks with vegetables                             | No | Yes | _____ times                              |
| e. Helped prepare a meal                                   | No | Yes | _____ times                              |
| f. Made a salad with fruits and vegetables                 | No | Yes | _____ times                              |
| g. Cut up fruit                                            | No | Yes | _____ times                              |
| h. Cut up vegetables                                       | No | Yes | _____ times                              |
| i. Measured ingredients                                    | No | Yes | _____ times                              |
| j. Used a vegetable peeler                                 | No | Yes | _____ times                              |
| k. Used a can opener                                       | No | Yes | _____ times                              |

| Has _____ done the following on his/her own?                                   | No | Yes | If yes, how many times in the past week? |
|--------------------------------------------------------------------------------|----|-----|------------------------------------------|
| <b>l.</b> Read food labels                                                     | No | Yes | _____ times                              |
| <b>m.</b> Tried new foods                                                      | No | Yes | _____ times                              |
| <b>n.</b> Cleaned or washed fruits and vegetables before using                 | No | Yes | _____ times                              |
| <b>o.</b> Made beverages <b>without added sugar</b> with fruits and vegetables | No | Yes | _____ times                              |
| <b>p.</b> Helped with meal clean-up (e.g., clearing table, washing dishes)     | No | Yes | _____ times                              |

Your Activities: **During the past week**, have you done the following? If so, how many times [see **answer grid A10**] (place **X** in box)?

**Question #68**

*Your Activities*

| Have you done the following?                                                                         | No | Yes | If yes, how many times in the past week? |
|------------------------------------------------------------------------------------------------------|----|-----|------------------------------------------|
| <b>a.</b> Washed your hands for at least 20 seconds <u>before</u> and <u>during</u> food preparation | No | Yes | _____ times                              |
| <b>b.</b> Planned or helped decide which meals will be made at home                                  | No | Yes | _____ times                              |
| <b>c.</b> Grocery shopped for your family (e.g., choosing and purchasing foods at the store)         | No | Yes | _____ times                              |
| <b>d.</b> Cleaned or washed fruits and vegetables before using and cooking                           | No | Yes | _____ times                              |
| <b>e.</b> Prepared fruits in different ways (juicing, pureeing, and chopping)                        | No | Yes | _____ times                              |

| Have you done the following?                                                          | No | Yes | If yes, how many times in the past week? |
|---------------------------------------------------------------------------------------|----|-----|------------------------------------------|
| <b>f.</b> Prepared a salad with homemade dressing                                     | No | Yes | _____ times                              |
| <b>g.</b> Made beverages at home with vegetables and fruit <b>without added sugar</b> | No | Yes | _____ times                              |
| <b>h.</b> Prepared snacks at home for your children with vegetables and fruit         | No | Yes | _____ times                              |
| <b>i.</b> Made vegetable-focused dishes at home                                       | No | Yes | _____ times                              |
| <b>j.</b> Used herbs and spices (like basil, cilantro, garlic)                        | No | Yes | _____ times                              |
| <b>k.</b> Prepared meals with everything homemade (basic ingredients)                 | No | Yes | _____ times                              |
| <b>l.</b> Prepared foods with what you have at home                                   | No | Yes | _____ times                              |
| <b>m.</b> Suggested a new dish or recipe to prepare at home                           | No | Yes | _____ times                              |
| <b>n.</b> Packaged up and stored leftover food safely (for eating later)              | No | Yes | _____ times                              |
| <b>o.</b> Took lead on preparing a meal for your family                               | No | Yes | _____ times                              |
| <b>p.</b> Helped with meal clean-up (e.g., clearing table, washing dishes)            | No | Yes | _____ times                              |
| <b>q.</b> Ate vegetables as a snack                                                   | No | Yes | _____ times                              |

Your Cooking Confidence: I would like to ask you about how confident you feel to cook [see **answer grid A11**] (place X in box).

**Question #69**

*Your Cooking Confidence*

| You                                                                   | No | Yes |
|-----------------------------------------------------------------------|----|-----|
| a. Do you feel confident preparing a meal for your family?            | No | Yes |
| b. Are you very happy to cook for yourself?                           | No | Yes |
| c. Do you feel confident that what you cook will turn out as planned? | No | Yes |
| d. Are you willing to eat healthy?                                    | No | Yes |
| e. Are you willing to cook?                                           | No | Yes |
| f. Do you have good cooking skills?                                   | No | Yes |
| g. Do you like to try new foods?                                      | No | Yes |

Family Influence: I would like to ask about your and your family's **use of vegetables**.

|                                                    |  |
|----------------------------------------------------|--|
| 70. What vegetables do <u>you</u> like?            |  |
| 71. What vegetables do <u>you</u> <b>not</b> like? |  |

|                                                                                                   |  |
|---------------------------------------------------------------------------------------------------|--|
| 72. What vegetables does <u>your wife/partner</u> like?                                           |  |
| 73. What vegetables does <u>your wife/partner</u> <b>not</b> like?                                |  |
| 74. What vegetables does _____ like?                                                              |  |
| 75. What vegetables does _____ <b>not</b> like?                                                   |  |
| 76. What would be your wife/partner's reaction to having a vegetable prepared in a different way? |  |
| 77. What would be _____'s reaction to having a vegetable prepared in a different way?             |  |
| 78. Who would make it easy for _____ to eat vegetables?                                           |  |
| 79. Who would make it difficult for _____ to eat vegetables?                                      |  |



|                                                                     |  |
|---------------------------------------------------------------------|--|
| 80. What are the <b>benefits</b> of having vegetables in your home? |  |
| 81. What would help you to have vegetables in your home?            |  |

Food Security: Now I am going to ask you about the foods that you have in your home (**✓ the answer**).

|                                                                                                                                                                                                                               |                              |                             |                                            |
|-------------------------------------------------------------------------------------------------------------------------------------------------------------------------------------------------------------------------------|------------------------------|-----------------------------|--------------------------------------------|
| 82. In the <b><u>past month</u></b> , did you ever worry that you would run out of food before you got money to buy more?                                                                                                     | <input type="checkbox"/> Yes | <input type="checkbox"/> No | <input type="checkbox"/> Refused to answer |
| 83. In the <b><u>past month</u></b> , did your household ever run out of food?                                                                                                                                                | <input type="checkbox"/> Yes | <input type="checkbox"/> No | <input type="checkbox"/> Refused to answer |
| 84. In the <b><u>past month</u></b> , did your household ever run out of the foods needed to make a complete meal?                                                                                                            | <input type="checkbox"/> Yes | <input type="checkbox"/> No | <input type="checkbox"/> Refused to answer |
| 85. In the <b><u>past month</u></b> , did you ever use a low-cost food (such as macaroni and cheese, ramen noodles, peanut butter, or little or no meat, vegetables, or fruit) because there wasn't enough food for everyone? | <input type="checkbox"/> Yes | <input type="checkbox"/> No | <input type="checkbox"/> Refused to answer |
| 86. In the <b><u>past month</u></b> , did you or another adult in your household ever eat less or skipped meals because there wasn't enough food for everyone?                                                                | <input type="checkbox"/> Yes | <input type="checkbox"/> No | <input type="checkbox"/> Refused to answer |
| 87. In the <b><u>past month</u></b> , did you ever eat less than you wanted to because there wasn't enough food for everyone?                                                                                                 | <input type="checkbox"/> Yes | <input type="checkbox"/> No | <input type="checkbox"/> Refused to answer |
| 88. In the <b><u>past month</u></b> , were you ever hungry but didn't eat because there wasn't enough food for everyone?                                                                                                      | <input type="checkbox"/> Yes | <input type="checkbox"/> No | <input type="checkbox"/> Refused to answer |
| 89. In the <b><u>past month</u></b> , did you or another adult in your household ever <b>not eat</b> for <u>a whole day</u> because there wasn't enough food for everyone?                                                    | <input type="checkbox"/> Yes | <input type="checkbox"/> No | <input type="checkbox"/> Refused to answer |
| 90. In the <b><u>past month</u></b> , did you or another adult in your household ever have to <b>eat fewer meals</b> for <u>a whole day</u> because there wasn't enough food for everyone?                                    | <input type="checkbox"/> Yes | <input type="checkbox"/> No | <input type="checkbox"/> Refused to answer |

|                                                                                                                            |                              |                             |                                            |
|----------------------------------------------------------------------------------------------------------------------------|------------------------------|-----------------------------|--------------------------------------------|
| <b>91.</b> In the <b><u>past month</u></b> , did you ever have to choose between paying bills and buying food?             | <input type="checkbox"/> Yes | <input type="checkbox"/> No | <input type="checkbox"/> Refused to answer |
| <b>92.</b> In the <b><u>past month</u></b> , did you ever eat less food so that someone else in the family could eat more? | <input type="checkbox"/> Yes | <input type="checkbox"/> No | <input type="checkbox"/> Refused to answer |
| <b>93.</b> In the <b><u>past month</u></b> , did you or other adults in your household ever borrow money to buy food?      | <input type="checkbox"/> Yes | <input type="checkbox"/> No | <input type="checkbox"/> Refused to answer |

### BACKGROUND

|            | <u>Question</u>                                                                                    | <u>Answer</u>                                                                                                                                                                                                                                  |             |
|------------|----------------------------------------------------------------------------------------------------|------------------------------------------------------------------------------------------------------------------------------------------------------------------------------------------------------------------------------------------------|-------------|
| <b>94.</b> | What is your date of birth?                                                                        | ____ / ____ / ____<br>month    day    year                                                                                                                                                                                                     |             |
| <b>95.</b> | What was the highest grade you completed in school?                                                | <input type="checkbox"/> College degree <input type="checkbox"/> GED<br><input type="checkbox"/> Some college <input type="checkbox"/> Some school<br><input type="checkbox"/> High school degree <input type="checkbox"/> Didn't go to school |             |
| <b>96.</b> | At this moment, what is your marital status?                                                       | <input type="checkbox"/> Married<br><input type="checkbox"/> Living with partner – not married                                                                                                                                                 |             |
| <b>97.</b> | At this moment, what are the ages of people living in your home ( <b>not including yourself</b> )? | <b>Person</b>                                                                                                                                                                                                                                  | <b>Ages</b> |
|            |                                                                                                    | Adults<br>(18 or older)                                                                                                                                                                                                                        |             |
|            |                                                                                                    | Children<br>(17 or younger)                                                                                                                                                                                                                    |             |

End Time: \_\_\_\_\_ AM / PM

COMMENTS:
